# Supplementary figures and images for: Comparing the Performance of Raman and Near-Infrared Imaging in the Prediction of the In Vitro Dissolution Profile of Extended-Release Tablets Based on Artificial Neural Networks
Source: MDPI journal article supplement (doi:10.3390/ph16091243), 2023-09-01

Figure S1. Images of the tablets acquired with a digital camera.

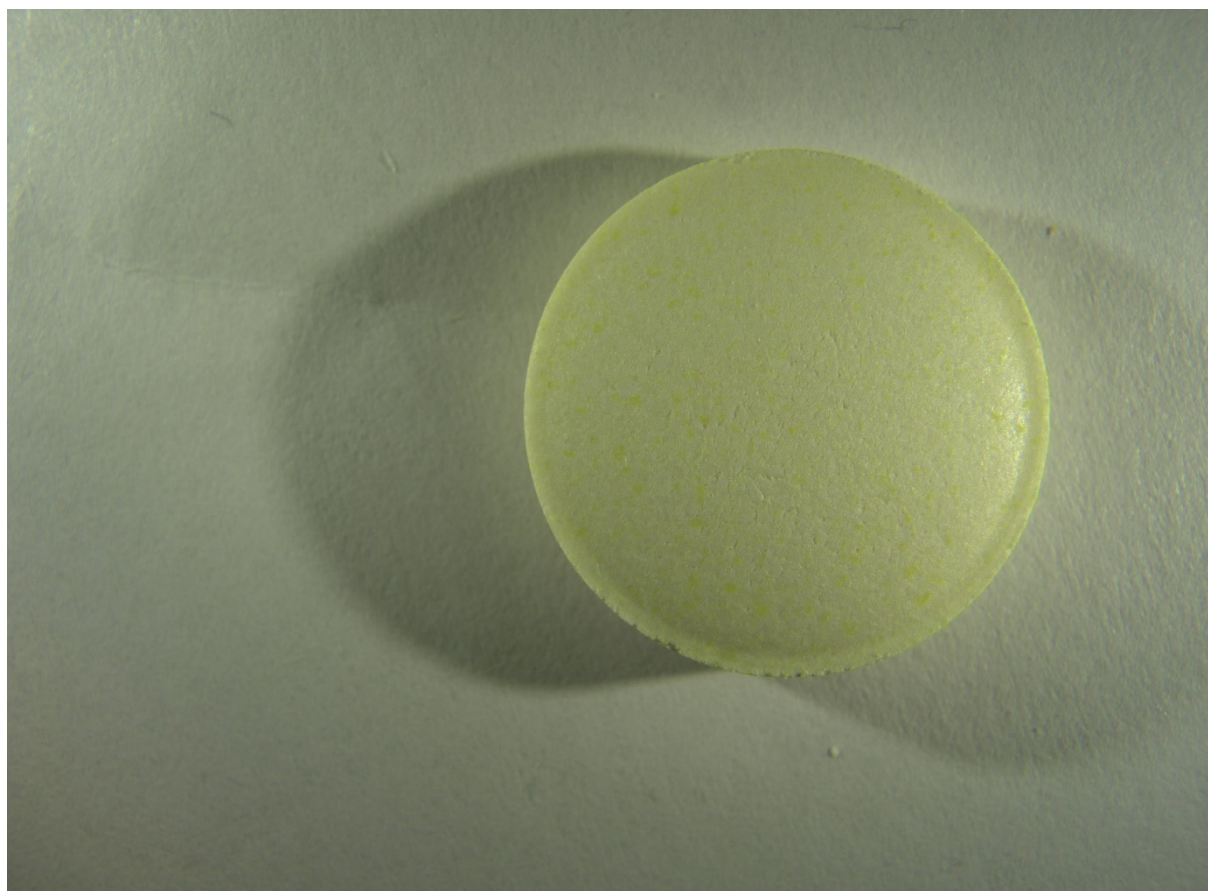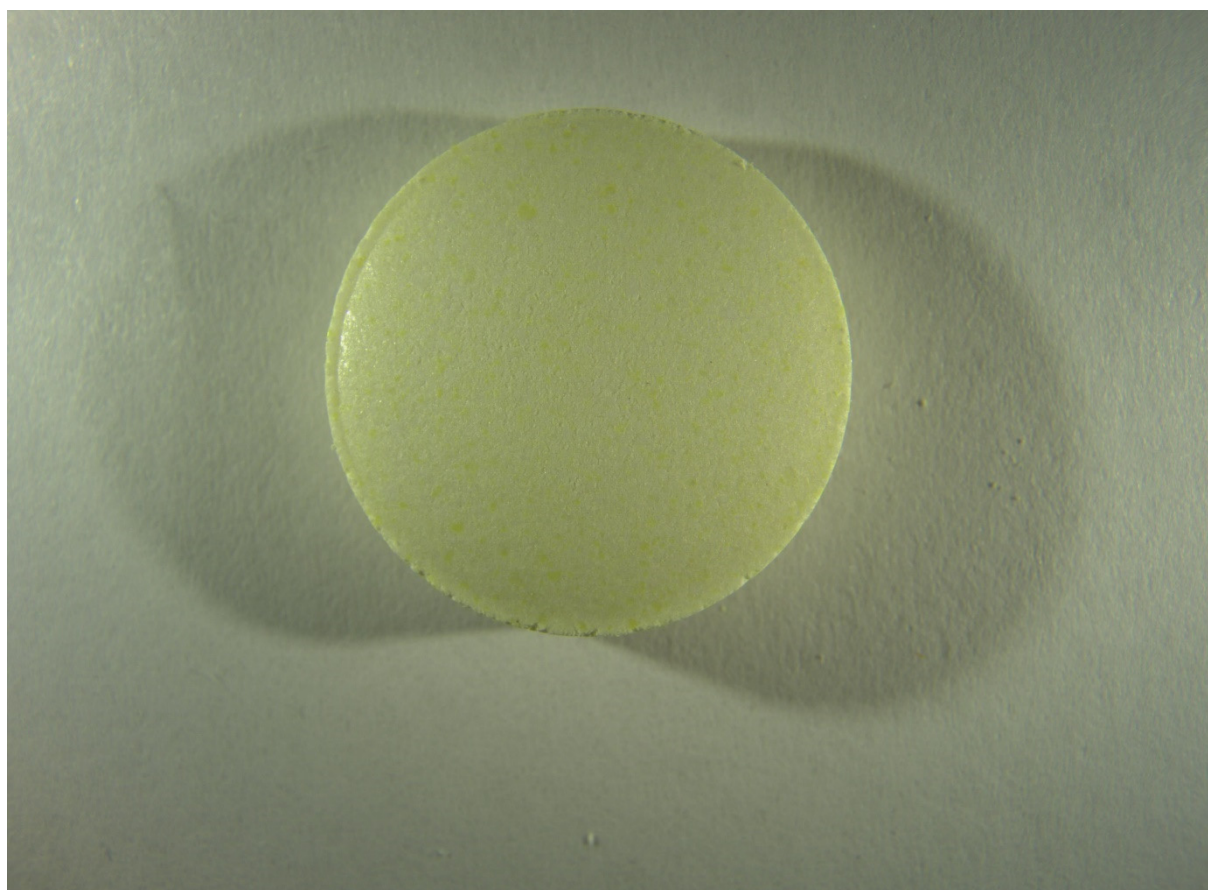

Supplement: s1 [file s1]
